# Supplementary material for: Docosahexaenoic acid alleviates cell injury and improves barrier function by suppressing necroptosis signalling in TNF-α-challenged porcine intestinal epithelial cells
Source: PubMed Central journal article supplement — Innate Immun. 2020 Oct 27;26(8):653–65. doi: 10.1177/1753425920966686 (PMC7787556; doi:10.1177/1753425920966686), 2020-10-27
Supplement: sj-pdf-5-ini-10.1177_1753425920966686.pdf [file sj-pdf-5-ini-10.1177_1753425920966686.pdf]

**Supplemental Table 1.** Statistical analysis of red count in every image for every single time point for necrosis of IPEC-1 cells after TNF- $\alpha$  challenge in the IncuCyte ZOOM™ live cell imaging system.

| Items<br>(red count/image) | PBS    |        | TNF- $\alpha$ |        | SEM   | P Value |               |             |
|----------------------------|--------|--------|---------------|--------|-------|---------|---------------|-------------|
|                            | CON    | DHA    | CON           | DHA    |       | DHA     | TNF- $\alpha$ | Interaction |
| 26 h                       | 14.562 | 13.375 | 13.395        | 11.812 | 1.291 | 0.308   | 0.308         | 0.887       |
| 28 h                       | 10.250 | 12.188 | 12.625        | 11.750 | 1.421 | 0.715   | 0.508         | 0.342       |
| 30 h                       | 11.063 | 14.562 | 13.625        | 12.563 | 1.115 | 0.296   | 0.805         | 0.063       |
| 32 h                       | 11.938 | 14.375 | 10.875        | 12.25  | 1.097 | 0.108   | 0.172         | 0.637       |
| 34 h                       | 13.188 | 14.875 | 12.063        | 11.938 | 1.162 | 0.514   | 0.106         | 0.451       |
| 36 h                       | 12.500 | 11.812 | 13.875        | 12.500 | 0.854 | 0.250   | 0.250         | 0.694       |
| 38 h                       | 15.438 | 13.813 | 12.938        | 13.188 | 1.291 | 0.604   | 0.249         | 0.481       |
| 40 h                       | 16.688 | 13.375 | 17.063        | 14.313 | 1.765 | 0.111   | 0.716         | 0.876       |
| 42 h                       | 16.000 | 15.813 | 17.063        | 14.500 | 1.417 | 0.351   | 0.931         | 0.418       |
| 44 h                       | 17.750 | 16.375 | 19.875        | 15.832 | 1.213 | 0.045   | 0.527         | 0.293       |
| 46 h                       | 21.563 | 17.438 | 27.500        | 20.250 | 1.770 | 0.007   | 0.029         | 0.395       |
| 48 h                       | 20.953 | 19.833 | 28.063        | 22.918 | 1.157 | 0.064   | 0.003         | 0.479       |

|      |                     |                     |                      |                     |       |       |        |       |
|------|---------------------|---------------------|----------------------|---------------------|-------|-------|--------|-------|
| 50 h | 23.625              | 20.563              | 32.875               | 30.668              | 1.412 | 0.087 | <0.001 | 0.767 |
| 52 h | 20.563              | 20.063              | 34.750               | 34.500              | 1.965 | 0.852 | <0.001 | 0.950 |
| 54 h | 23.813              | 23.375              | 46.375               | 45.750              | 2.745 | 0.850 | <0.001 | 0.973 |
| 56 h | 23.313              | 22.688              | 46.000               | 49.583              | 3.915 | 0.712 | <0.001 | 0.601 |
| 58 h | 24.625              | 24.438              | 62.063               | 58.668              | 4.779 | 0.714 | <0.001 | 0.743 |
| 60 h | 22.688              | 25.500              | 60.938               | 57.833              | 5.255 | 0.978 | <0.001 | 0.584 |
| 62 h | 25.938              | 28.750              | 71.875               | 73.582              | 6.253 | 0.724 | <0.001 | 0.931 |
| 64 h | 24.375              | 26.375              | 72.625               | 71.500              | 4.950 | 0.931 | <0.001 | 0.758 |
| 66 h | 25.625              | 30.875              | 93.250               | 84.083              | 7.626 | 0.802 | <0.001 | 0.363 |
| 68 h | 24.125              | 28.313              | 94.125               | 85.118              | 6.665 | 0.768 | <0.001 | 0.371 |
| 70 h | 28.333 <sup>c</sup> | 33.438 <sup>c</sup> | 117.063 <sup>a</sup> | 89.860 <sup>b</sup> | 4.995 | 0.047 | <0.001 | 0.007 |
| 72 h | 25.625 <sup>c</sup> | 27.021 <sup>c</sup> | 110.875 <sup>a</sup> | 87.000 <sup>b</sup> | 5.585 | 0.039 | <0.001 | 0.070 |

---

<sup>abc</sup>Means without a common letter differ,  $P < .05$
