# Supplementary material for: Docosahexaenoic acid alleviates cell injury and improves barrier function by suppressing necroptosis signalling in TNF-α-challenged porcine intestinal epithelial cells
Source: PubMed Central journal article supplement — Innate Immun. 2020 Oct 27;26(8):653–65. doi: 10.1177/1753425920966686 (PMC7787556; doi:10.1177/1753425920966686), 2020-10-27
Supplement: sj-pdf-6-ini-10.1177_1753425920966686.pdf [file sj-pdf-6-ini-10.1177_1753425920966686.pdf]

## **Supplementary material**

**Supplemental Video 1.** Real time dynamic changes of necrosis of IPEC-1 cells in the control group. Necrotic cells were stained with yoyo-3 and monitored from 0 to 72 h.

**Supplemental Video 2.** Real time dynamic changes of necrosis in IPEC-1 cells in the DHA group. Necrotic cells were stained with yoyo-3 and monitored from 0 to 72 h.

**Supplemental Video 3.** Real time dynamic changes of necrosis in IPEC-1 cells for the TNF- $\alpha$  group. Necrotic cells were stained with yoyo-3 and monitored from 0 to 72 h.

**Supplemental Video 4.** Real time dynamic changes of necrosis in IPEC-1 cells for the DHA+TNF- $\alpha$  group. Necrotic cells were stained with yoyo-3 and monitored from 0 to 72 h.
